# Supplementary material for: Comparing the predictive value of plasma p-tau217 and CSF biomarkers (p-tau181, Aβ42) using amyloid positron emission tomography in Alzheimer's continuum
Source: Research Square preprint supplement (doi:10.21203/rs.3.rs-7327653/v1), 2025-09-26
Supplement: Supplementary file 1 [file 7de5d75cbf244e08cdd0909e.docx]

**Tables**

| **Table S1.** Datasets used for analysis in this study | |
| --- | --- |
| File description | File name_access date |
| UC Berkeley - Amyloid PET 6mm Res analysis [ADNI1,GO,2,3,4] | UCBERKELEY_AMY_6MM_30Jan2024 |
| Janssen Plasma p217 + tau Simoa Assay  [ADNI2,3] | JANSSEN_PLASMA_P217_TAU_30Jan2024 |
| UPENN CSF Biomarker Master Alzbio3 (BATCH1-8)  [ADNI1,GO,2] | UPENNBIOMK_MASTER_FINAL_30Jan2024 |
| ADAS-Cognitive Behavior  [ADNI1,GO,2,3,4] | ADAS_ADNIGO23_30Jan2024 |
| Clinical Dementia Rating  [ADNI1,GO,2,3,4] | CDR_30Jan2024 |
| Subject Demographics  [ADNI1,GO,2,3,4] | PTDEMOG_30Jan2024 |
